# Supplementary material for: The Arabidopsis gene DIG6 encodes a large 60S subunit nuclear export GTPase 1 that is involved in ribosome biogenesis and affects multiple auxin-regulated development processes
Source: PubMed Central journal article supplement (PMC4623693; doi:10.1093/jxb/erv391), 2015-08-13
Supplement: supp_erv391_jexbot148007_file001.pdf [file supp_erv391_jexbot148007_file001.pdf]

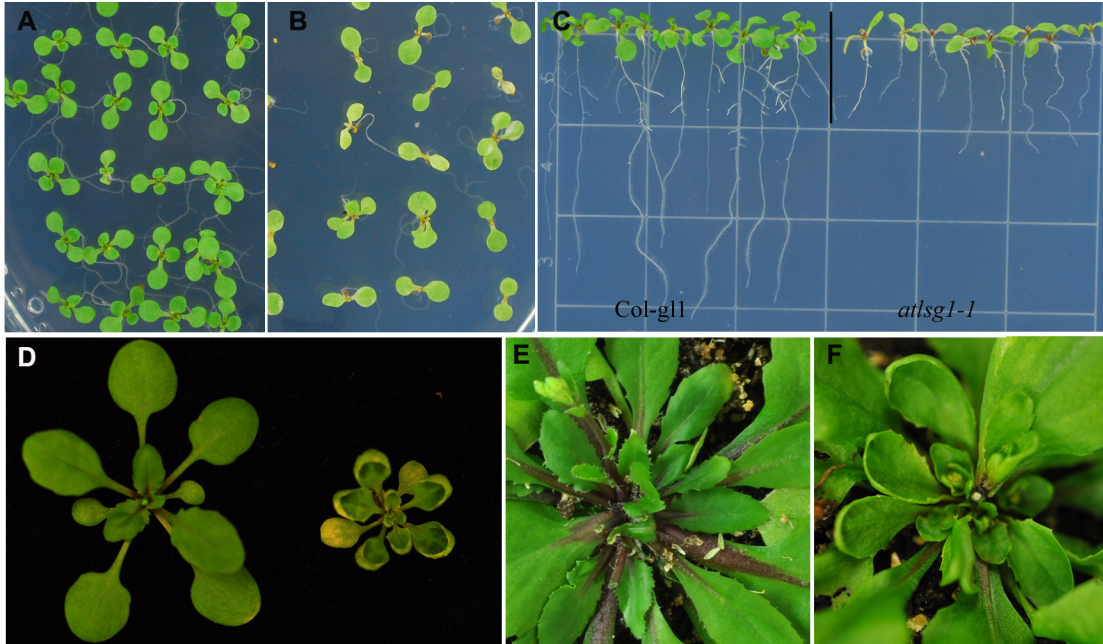

**Figure S1.** The phenotypes of *dig6* mutant. (A-C) Twelve-day-old seedlings grown on horizontally (A-B) or vertically (C) placed agar plates. Seedlings in (A) and on the left of panel (C) are wild type (*Col-gll*) and in (B) and on the right of panel (C) are *dig6*. (D) Twenty-eight-day-old *Col-gll* (left) and *dig6* (right). (E-F) Newly emerged axillary leaves of *Col-gll* (E) and *dig6*.

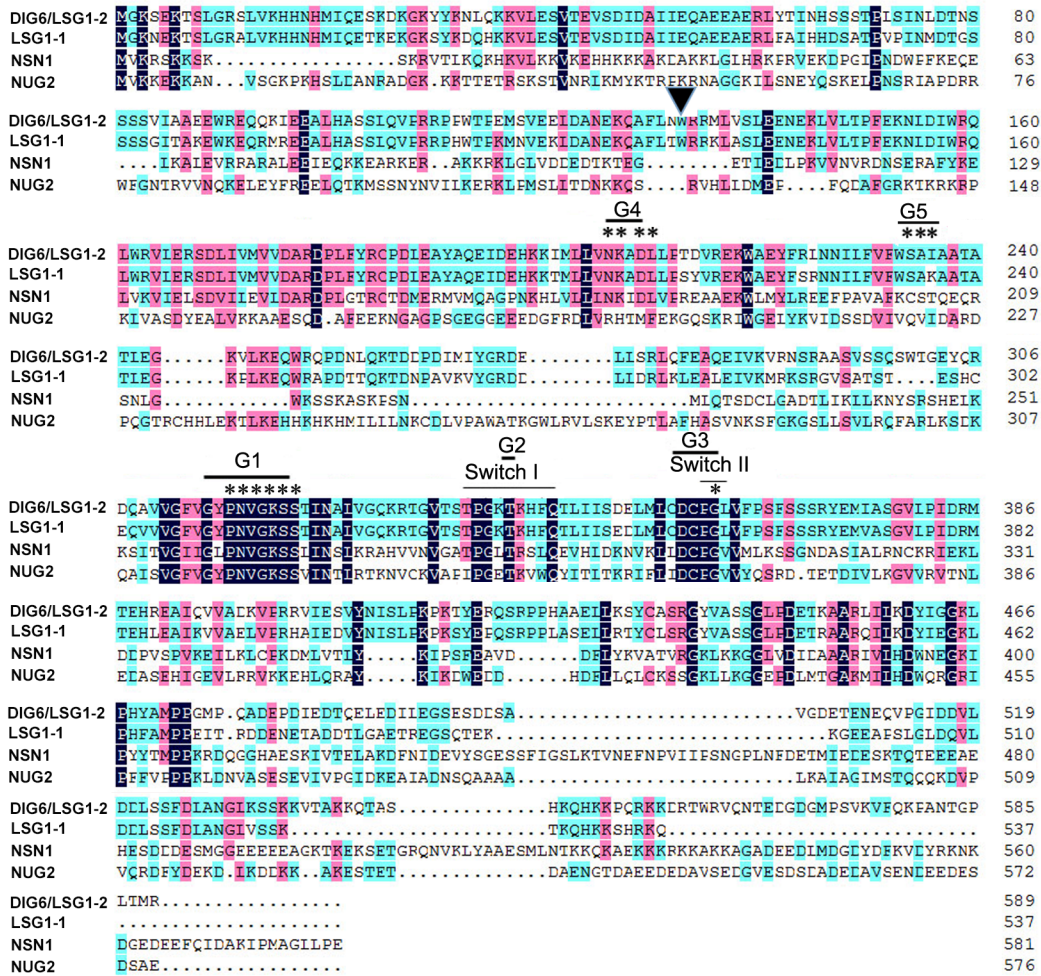

**Figure S2.** Multiple alignment of AtLSG1-related proteins. The accession numbers of DIG6/LSG1-2, LSG1-1, NSN1 and NUG2 are Atlg08410, At2g27200, At3g07050, and At1g52980, respectively. The putative motifs were marked by black lines above the sequence. Asterisks represent GTP/Mg<sup>2+</sup> binding sites.

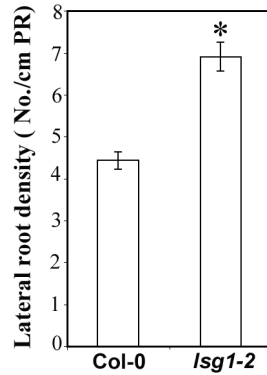

**Figure S3.** Lateral root density. Lateral root number was counted in the primary root of 12-day-old seedlings. Asterisk indicates significant difference from wild type plants (*t*-test, \*  $p < 0.01$ ).

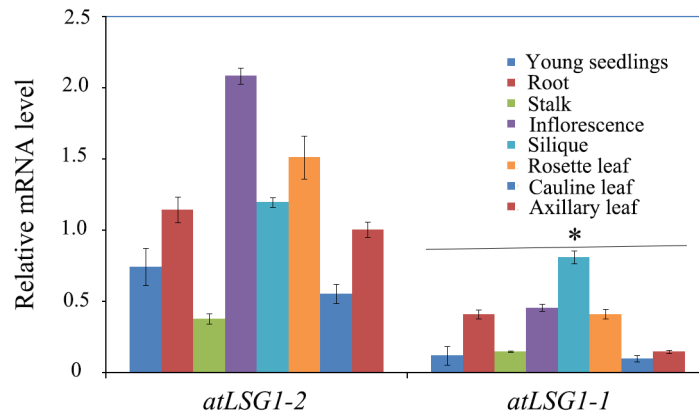

**Figure S4.** The tissue-specific expression pattern of *atLSG1-1* and *atLSG1-2*. RNA was extracted from 12-day-old seedlings and different organs of mature plants. Real time RT-PCR was carried out. Student *t*-test was carried out for comparing the different expression levels of *atLSG1-1* and *atLSG1-2* in various organs. Asterisk indicates significant differences between two genes (*t*-test, \*  $p < 0.01$ ).

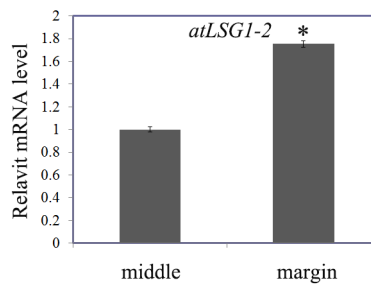

**Figure S5.** The expression of *atLSG1-2* in leaf middle and margin regions. Total RNA was extracted from the leaf mid vein or margin regions, and real time RT-PCR was carried out using *atLSG1-2* specific primers. Asterisk indicates significant difference from wild type plants (*t*-test, \*  $p < 0.01$ ).

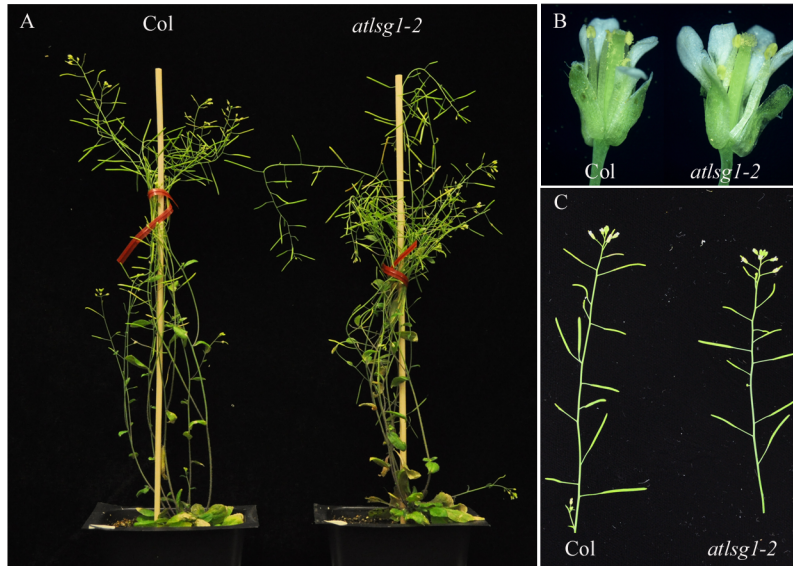

**Figure S6.** The *atlsg1-2* mutant displayed no visible phenotype at late development stages. Morphology of (A) the mature plants, (B) flowers, and (C) siliques of the wild type Col-0 and *atlsg1-2*.

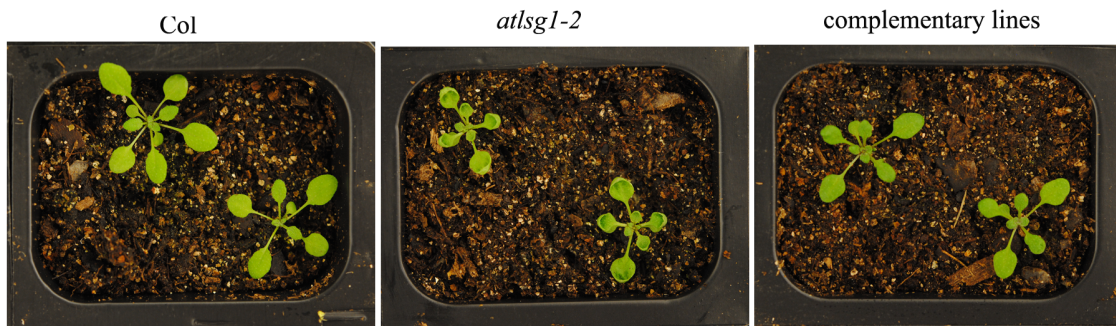

**Figure S7.** *35S::YFP-AtLSG1* complements the phenotypes of the *lsg1-2* mutant.

**Table S2 Primer list in this study**

| <b>purpose</b>                           | <b>gene name</b> | <b>sequence</b>                         |
|------------------------------------------|------------------|-----------------------------------------|
| <b>for mapping</b>                       | Chr1-1.070MF     | GAGCTGGTGAGAGCCAAAGTTTCC                |
|                                          | Chr1-1.070MR     | CACGTAGAAGCGATCACAGAGATAC               |
|                                          | Chr1-3.824MF     | CCCTAGTCGAGTATTACAGCGACTC               |
|                                          | Chr1-3.824MR     | TACAGCCATTAGGTCTTATAACCGAT              |
| <b>for checking the transcripts of</b>   | OXH89-F          | CTCGAGAACTACTGCGACAGG                   |
|                                          | OXH76-R          | TGGAGACAACCCGATAACTTG                   |
| <b>for vector construction</b>           | AtLSG1-F         | CACCATGGGGAAGAGCGAAAAGAC                |
|                                          | AtLSG1-R         | CCGCATCGTAAGAGGACCTG TG                 |
|                                          | AtLSG1-R         | TCACCGCATCGTAAGAGGAC                    |
|                                          | AtLSG1 like-F    | CACCATGGGGAAGA ACGAGAAAAC               |
|                                          | AtLSG1 like-R    | TTGTTTCTATGTGACTTCTT                    |
| <b>for making yeast constructs</b>       | LSG1-F           | CTGACTAGTAAAATGCCACAAAAGAAGCTCC         |
|                                          | LSG1-R           | TCTGTCGACCTAATTATTTCAATGCTAAAAACT       |
|                                          | AtLSG1-F         | CTGACTAGTAAAATGGGGAAGAGCGAAAAGAC        |
|                                          | AtLSG1-R         | ACTGTCGACGGATCCTCACCGCATCGTAAGAGGAC     |
|                                          | AtLSG1 like-F    | CTGACTAGTAAAATGGGGAAGAACGAGAAAAC        |
|                                          | AtLSG1 like-R    | ACTGTCGACGGATCCTCATTGTTTCTATGTGACTT     |
| <b>for making PAtLSG1::GUS construct</b> |                  | CACCTTGACAGACTGTGAGTTGGAT               |
|                                          |                  | CTCTCTGTTTCAAGTAAACC                    |
| <b>For making artificial microRNA</b>    | I miR-s          | gaTTACTTGAAACTACTCGCGTtctctctttgtattcc  |
|                                          | II miR-a         | gaACGCGAGTAGTCTTCAAGTAAtcaagagaatcaatga |
|                                          | III miR*s        | gaACACGAGTAGTCTACAAGTATcacaggtcgtgatg   |
|                                          | IV miR*a         | gaATACTTGTAGACTACTCGGTtctacatatattcct   |
| <b>For real-time PCR</b>                 | PIN3-F           | CGCCGAGATGGTCTAAACAAA                   |
|                                          | PIN3-R           | AAAGCGACGAGAGCCAAATAA                   |
|                                          | IAA10-F          | GTGAAGGTGACAATGGACGG                    |
|                                          | IAA10-R          | GGAACATCTCCTACAAGCATCC                  |
|                                          | IAA20-F          | GAGGAGGAAGAAGAGAATGAGTGT                |
|                                          | IAA20-R          | TCAGCCCAGAGAATGGATGC                    |
|                                          | IAA30-F          | GAACCTAAGCACGGACCTGA                    |
|                                          | IAA30-R          | TCATCATTTCTCTGCCGA                      |
|                                          | IAA13-F          | GATGCTTGTGGTGTGTTCCA                    |
|                                          | IAA13-R          | TGCTTTCGCTGTCTCTCGTT                    |
|                                          | GH3.6-F          | ATGTCCTAAGCGTGGCTGGT                    |
|                                          | GH3.6-R          | GGCGTGTACCCTCAAGCA                      |
|                                          | LBD33-F          | GATTGAGTTTCTCGGGTCACAG                  |
|                                          | LBD33-R          | CCCATCATAGCAGTTTCTCCG                   |
|                                          | ACS6 -F          | TCCAGGCGTTCGTTCCATT                     |
|                                          | ACS6 -R          | AGCCATCGGTTTAGTCTCTCC                   |
